# Supplementary material
Source: PubMed Central journal article supplement (PMC6894076)
Supplement: fj.201901279R.sd1.pdf [file fj.201901279R.sd1.pdf]

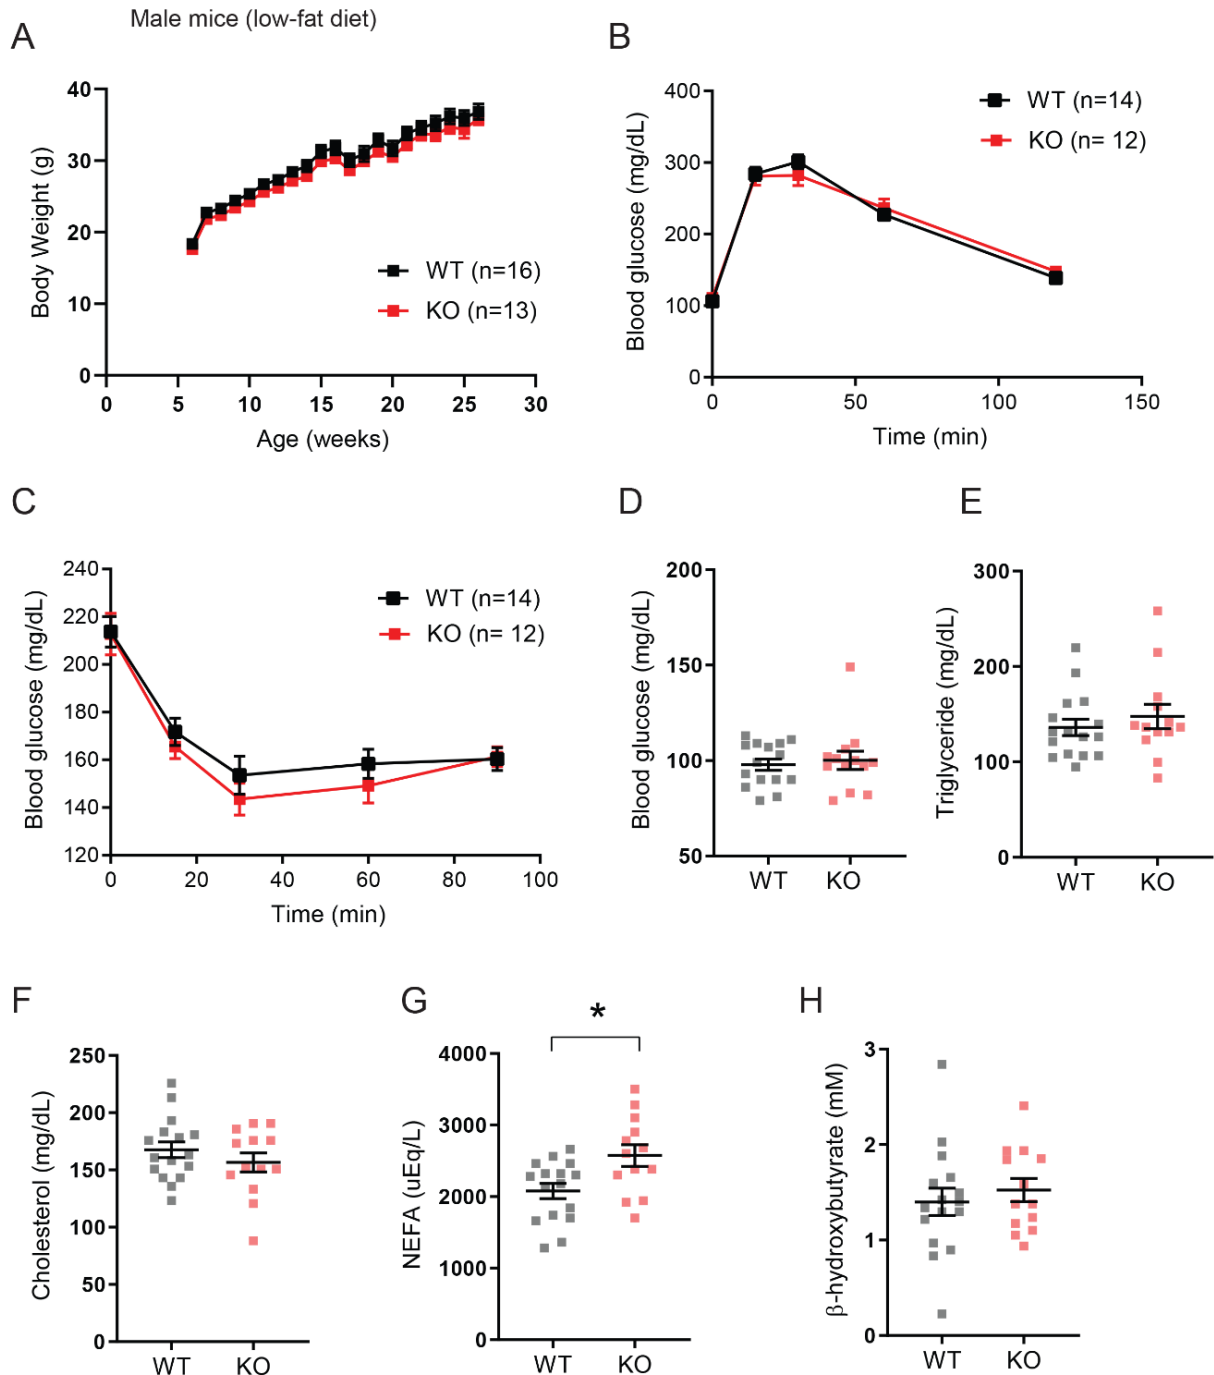

**Supplemental Figure S1. Metabolic parameters of WT and *Pradcl* KO male mice fed a control low-fat diet.** **A**, Body weight gain over time in WT (n=16) and KO (n=13) male mice. **B-C**, Glucose tolerance (B) and insulin tolerance (C) tests in WT (n=14) and KO (n=12) male mice at 18 and 19 weeks of age. **D-H**, Overnight fasting blood glucose, serum triglyceride, cholesterol, non-esterified free fatty acids (NEFA), and  $\beta$ -hydroxybutyrate in 17-week-old WT (n=16) and KO (n=13) male mice. Data are expressed as mean  $\pm$  SEM. \* $P < 0.05$

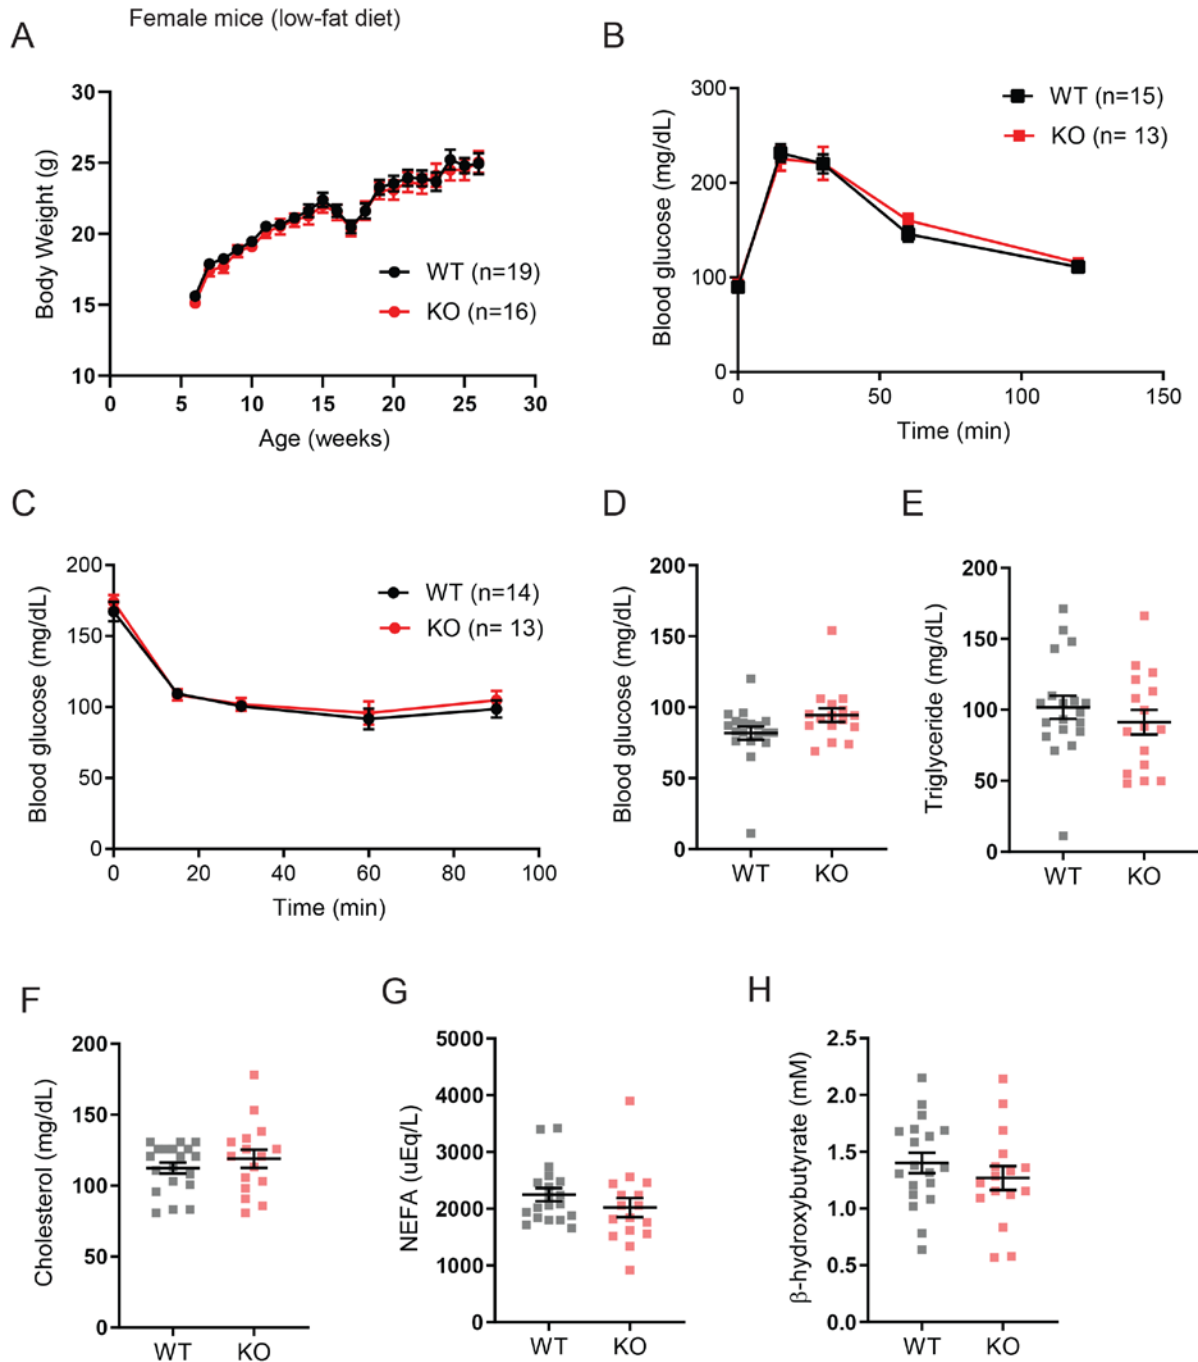

**Supplemental Figure S2. Metabolic parameters of WT and *Pradcl* KO female mice fed a control low-fat diet.** **A**, Body weight gain over time in WT (n=19) and KO (n=16) female mice. **B-C**, Glucose tolerance (B) and insulin tolerance (C) tests in WT (n=14 or 15) and KO (n=13) female mice at 18 and 19 weeks of age. **D-G**, Overnight fasting blood glucose, serum triglyceride, cholesterol, non-esterified free fatty acids (NEFA), and  $\beta$ -hydroxybutyrate in 17-week-old WT (n=19) and KO (n=16) female mice. Data are expressed as mean  $\pm$  SEM.

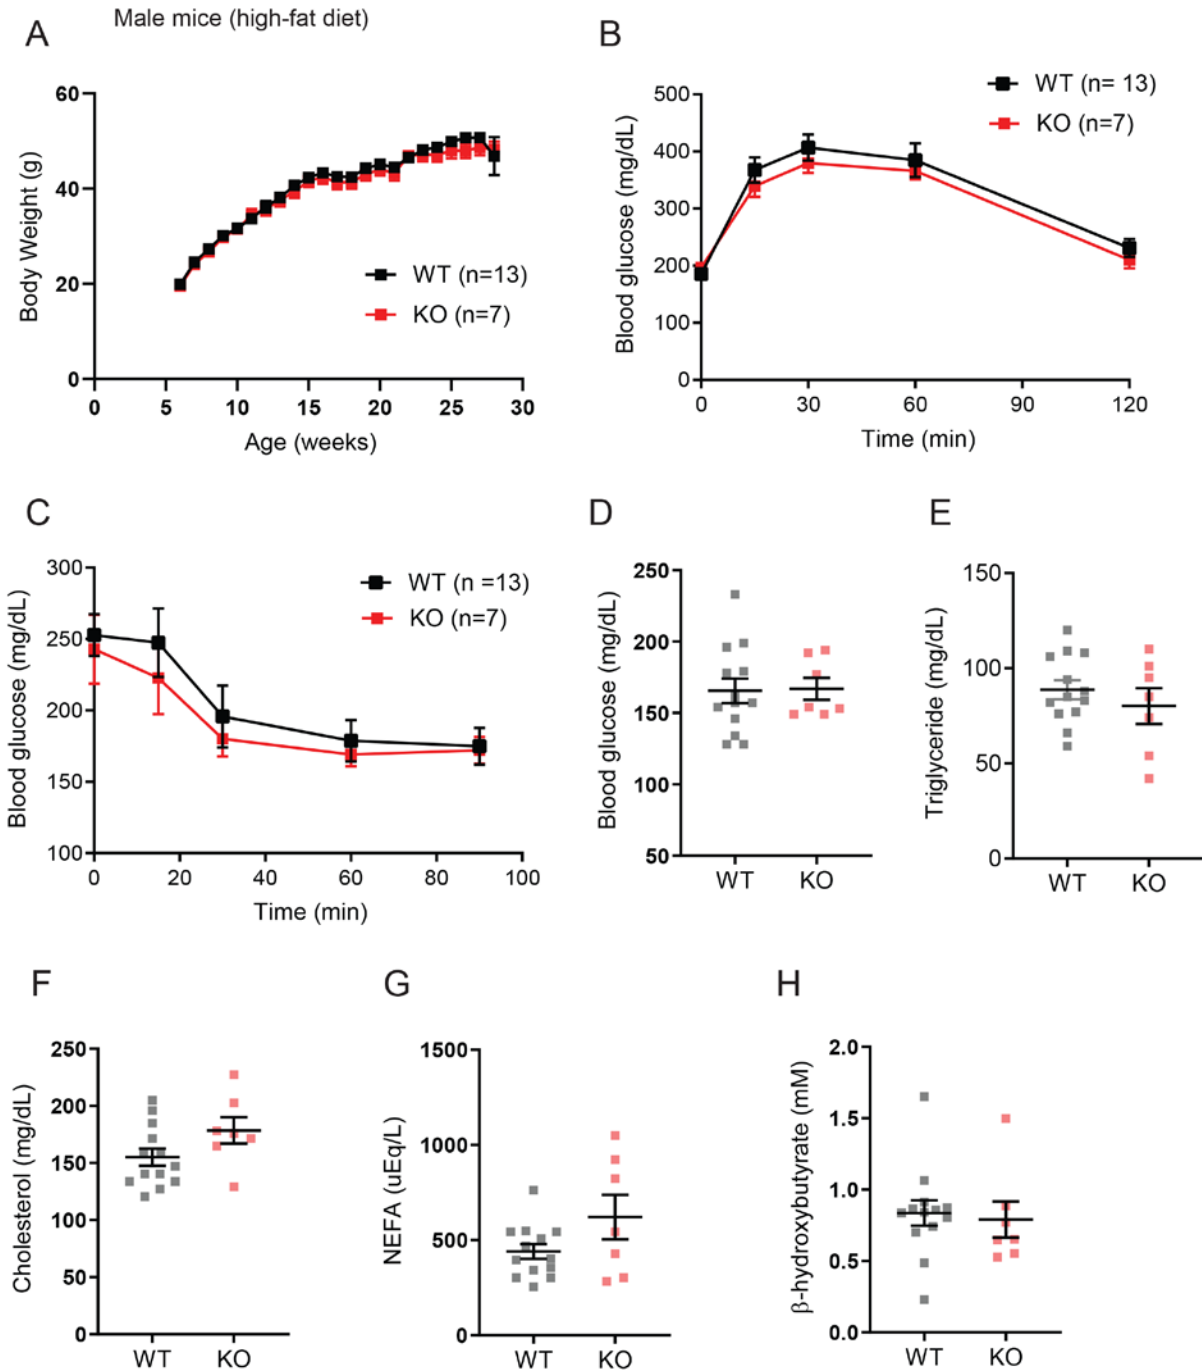

**Supplemental Figure S3. Metabolic parameters of WT and *Pradcl* KO male mice fed a high-fat diet.** A, Body weight gain over time in WT (n=13) and KO (n=7) male mice. B-C, Glucose tolerance (B) and insulin tolerance (C) tests in WT (n=13) and KO (n=7) male mice at 18 and 20 weeks of age. D-H, Overnight fasting blood glucose, serum triglyceride, cholesterol, non-esterified free fatty acids (NEFA), and  $\beta$ -hydroxybutyrate in 17-week-old WT (n=13) and KO (n=7) male mice. Data are expressed as mean  $\pm$  SEM.

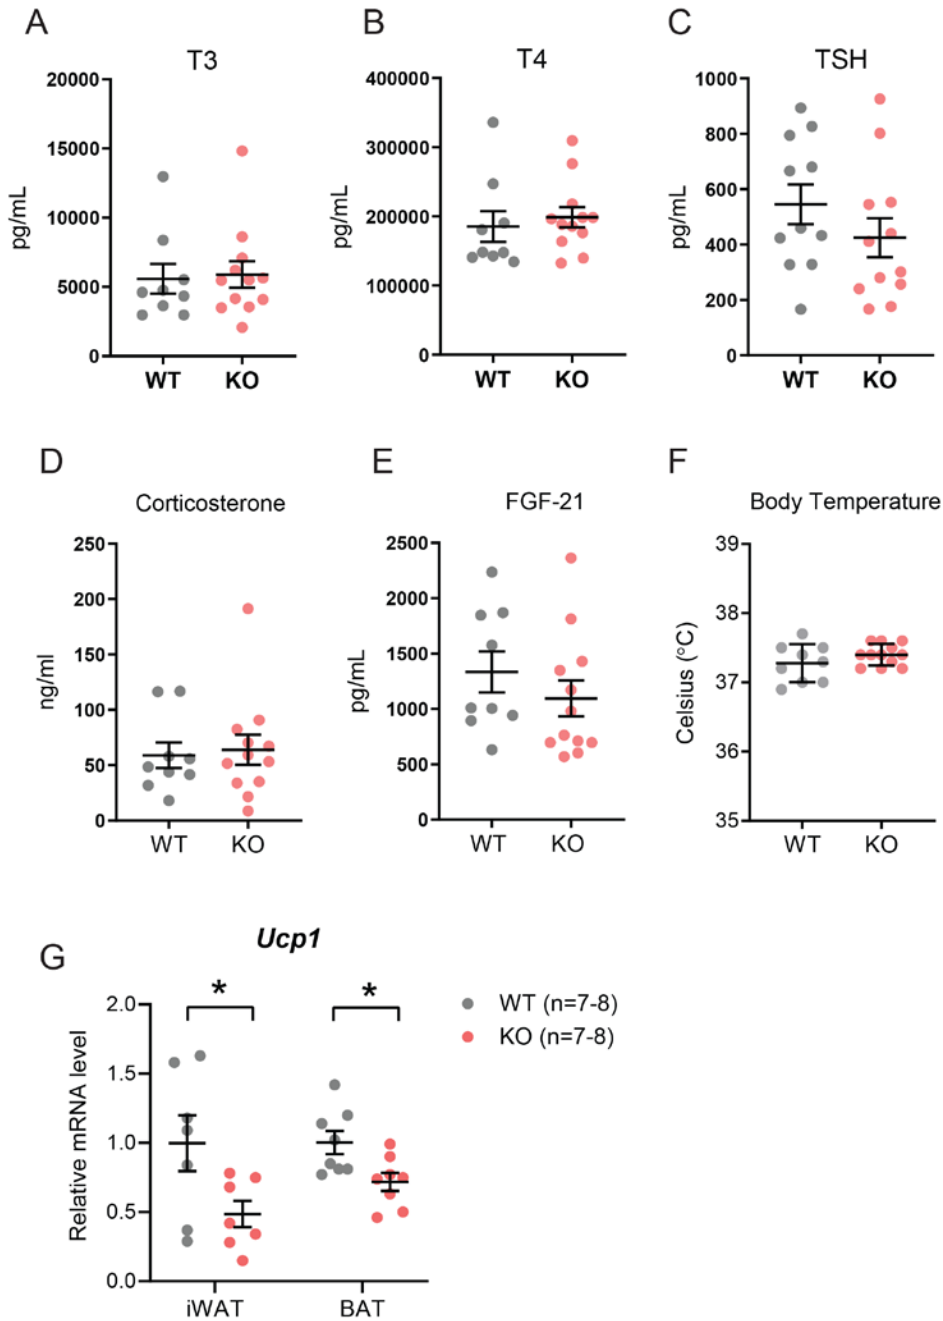

**Supplemental Figure S4. Serum levels of thyroid hormones, corticosterone, FGF-21, and body temperature of WT and *Pradcl* KO female mice fed a high-fat diet. A-E**, Serum T3, T4, thyroid stimulating hormone (TSH), corticosterone, and FGF-21 levels in 40-week-old WT (n=9-11) and KO (n=12) female mice. **F**, Body temperature of WT and KO female mice as measured by a rectal probe (Physitemp; model BAT-12). **G**, Real-time PCR analysis of *Ucp-1* expression in inguinal white adipose tissue (iWAT) and interscapular brown adipose tissue (BAT) of WT and KO female mice. Data are expressed as mean  $\pm$  SEM. \* $P$ <0.05
